# Supplementary material
Source: Elsevier journal article supplement (https://www.sciencedirect.com/science/article/pii/S0034709418301983)

Material Online:

**Figura 1** Distribuição da amostra de 220 pacientes encaminhados para investigação, 1997‒2010. HM, Hipertermia Maligna; +, positivo; -, negativo. *Investigação, em paciente suspeito de suscetibilidade à HM ou em familiar pelo teste de contratura muscular *in vitro*.


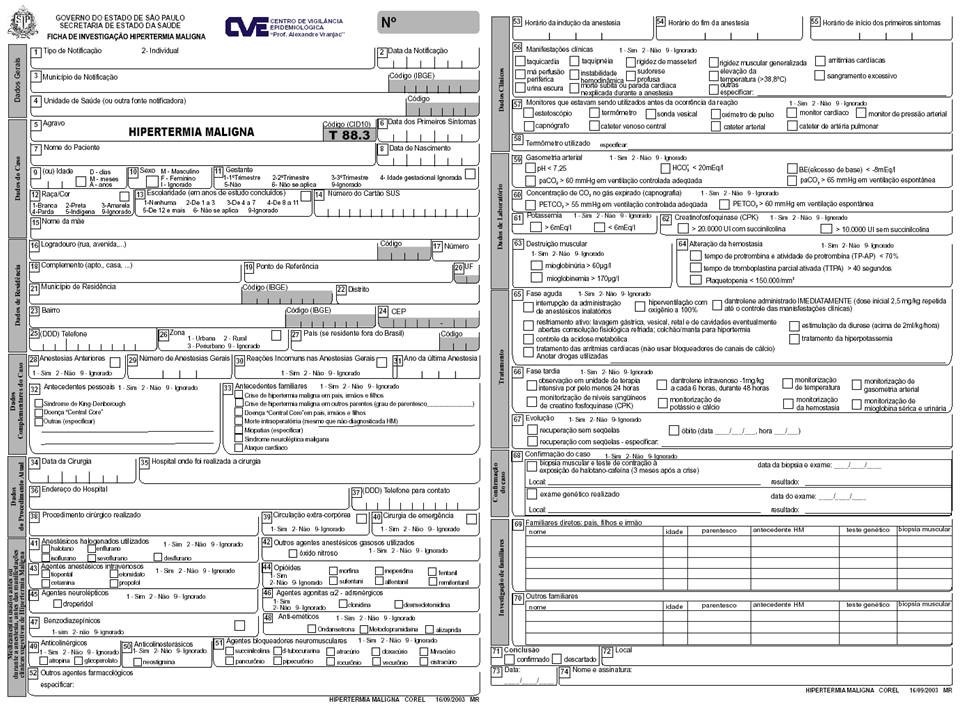


**Figura 2** Ficha de investigação de hipertermia maligna.


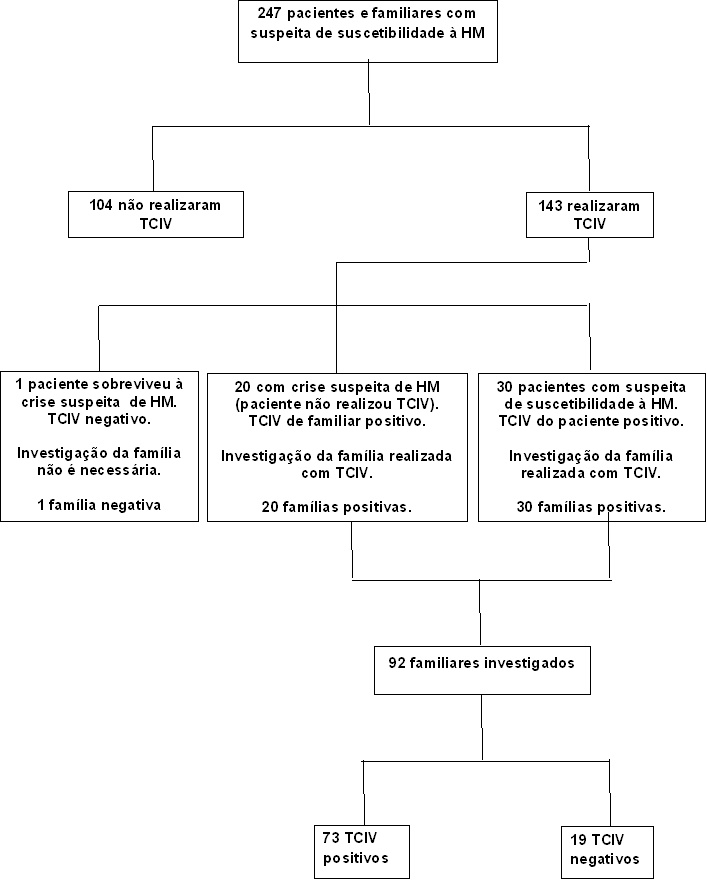

Supplement: mmc1 [file S0034709418301983:mmc1.docx]
